# Supplementary material for: Simultaneous passivation on both A and X sites of halogen perovskite with magnesium benzoate
Source: Royal Society of Chemistry journal article supplement (doi:10.1039/d2ra06761g), 2023-01-01
Supplement: d2ra06761g1.pdf [file d2ra06761g1.pdf]

## **Simultaneous Passivation on Both A and X Sites of Halogen Perovskite with Magnesium Benzoate**

Chenxin Xu<sup>a</sup>, Lujie Liu<sup>a</sup>, Yurong Huang<sup>b</sup>, Fei Zhang<sup>b</sup>, Hui Cao<sup>a\*</sup>

- a. School of Chemistry and Materials Science, Nanjing University of Information Science and Technology, Nanjing 210044, People's Republic of China.
- b. School of Environmental Science and Engineering, Nanjing University of Information Science and Technology, Nanjing 210044, People's Republic of China.

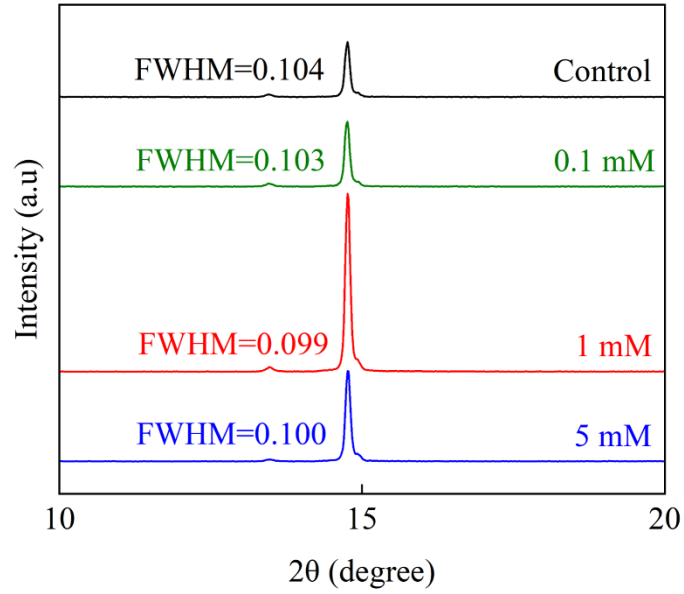

Fig. S1. The full width at half-maximum (FWHM) of the (100) peak.

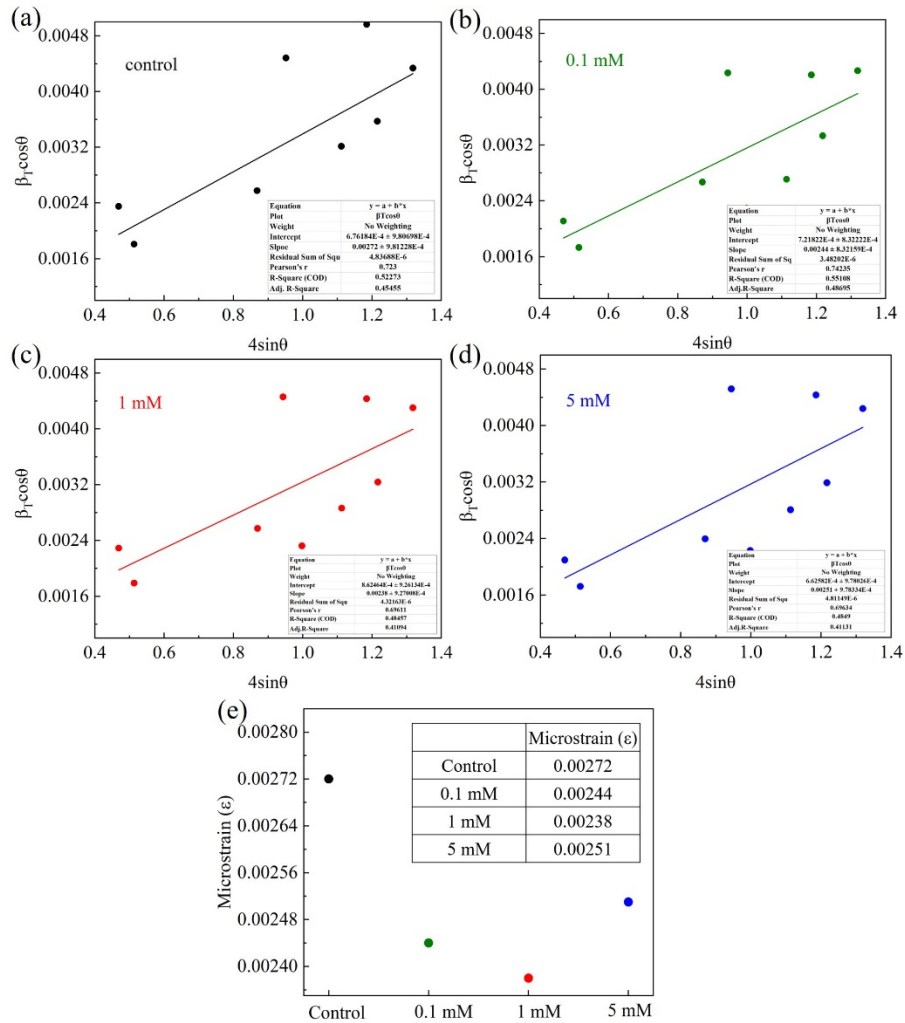

Fig. S2. (a)-(d) Williamson-Hall plots with different MgBE-modified in FAPbI<sub>3</sub> and control. (e) Strain obtained from the XRD patterns of different concentrations of perovskite film.

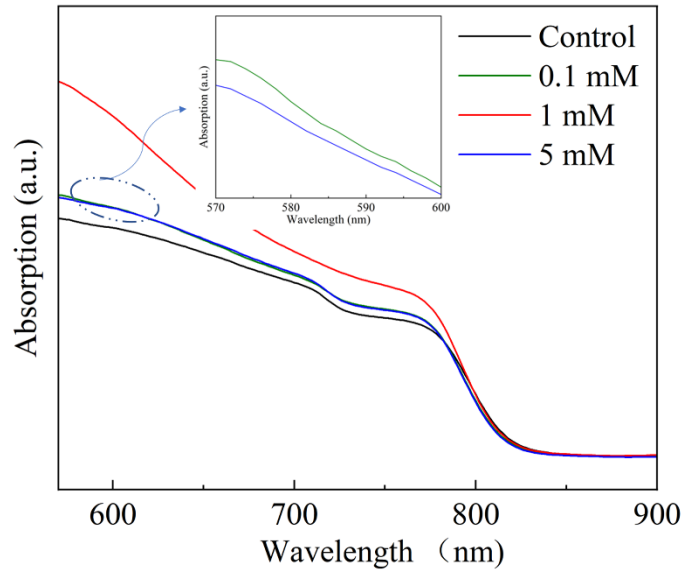

Fig. S3. Other UV-vis absorption spectra of different concentrations MgBEN-modified perovskite films.

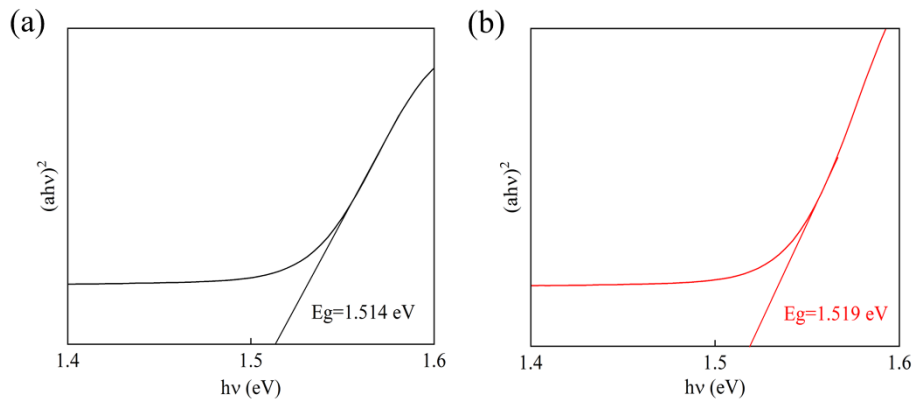

Fig. S4. Tauc plot of (a) control, (b) 1 mM MgBEN-modified perovskite film.

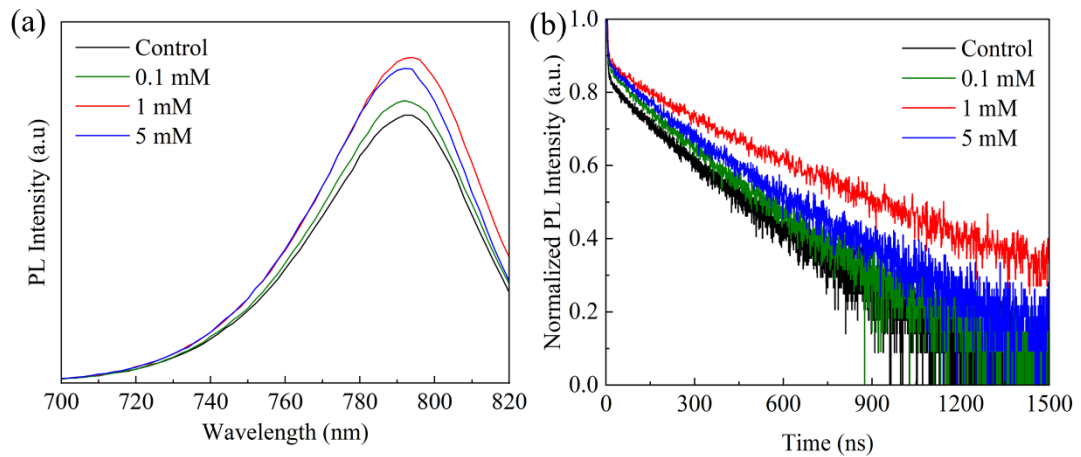

Fig. S5. Other concentrations of PL (a) and TRPL (b).

Table S1. TRPL parameters of perovskite films of different concentrations MgBEN - modified.

| Samples | $A_1$ (%) | $\tau_1$ (ns) | $A_2$ (%) | $\tau_2$ (ns) | $\tau_{ave}$ (ns) |
|---------|-----------|---------------|-----------|---------------|-------------------|
| Control | 71.09     | 1.622         | 28.91     | 161.28        | 157.43            |
| 0.1 mM  | 67.50     | 2.33          | 32.50     | 175.25        | 170.60            |
| 1 mM    | 56.72     | 3.40          | 43.28     | 293.28        | 288.94            |
| 5 mM    | 60.76     | 2.58          | 39.24     | 202.24        | 198.37            |

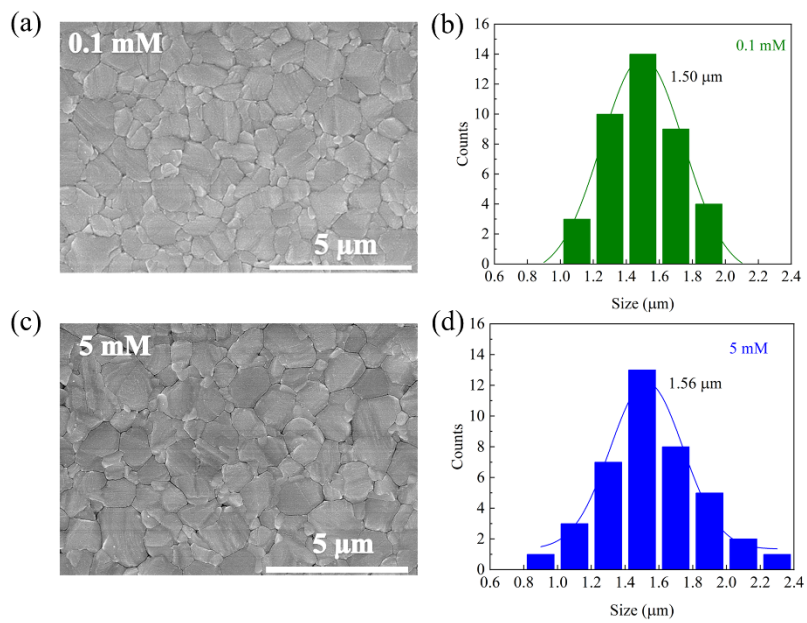

Fig. S6. Top-view SEM images of the 0.1 mM (a), 5 mM MgBEN-modified (c) perovskite films. Histograms of grain size distributions of the 0.1 mM (b), 5 mM MgBEN-modified (d) perovskite films, respectively.

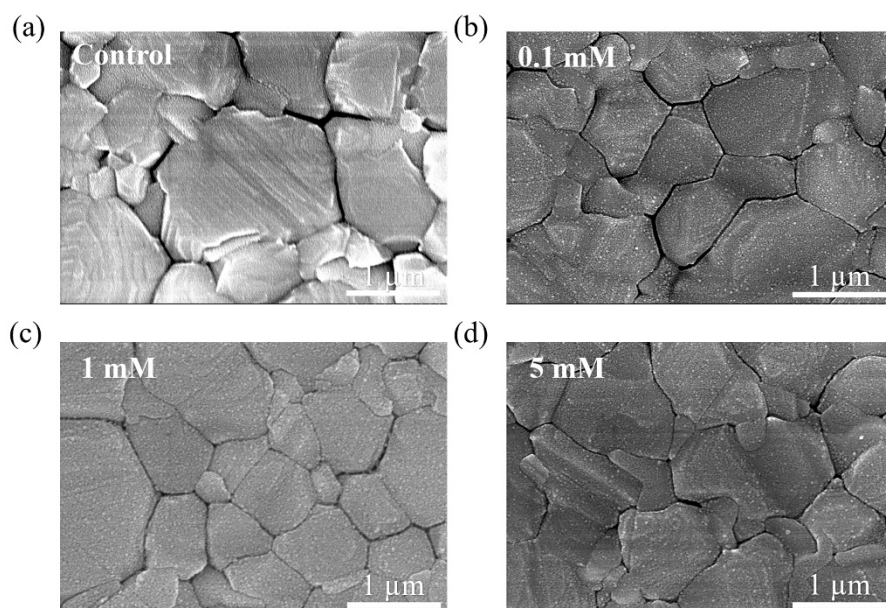

Fig. S7. Top-view SEM images of the control (a), 0.1 mM (b), 1mM (c) and 5 mM (d) MgBEN-modified perovskite films.

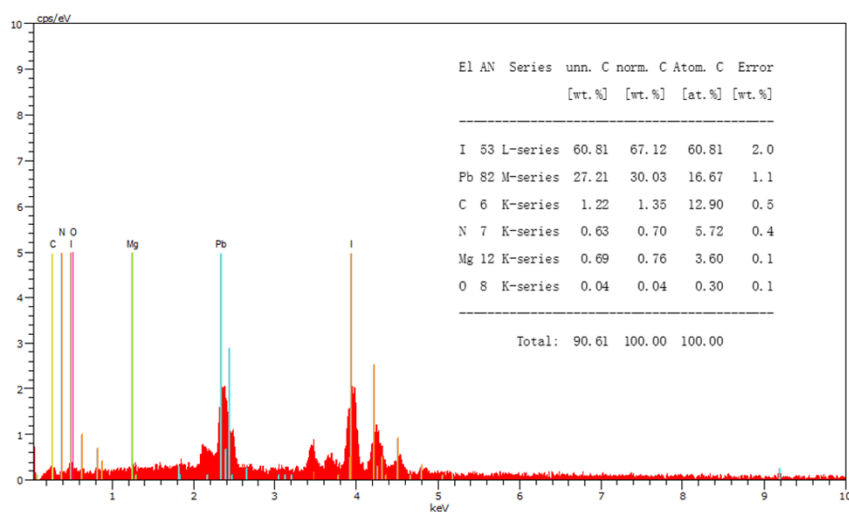

Fig. S8. EDS of 1 mM MgBEN-modified perovskite film.

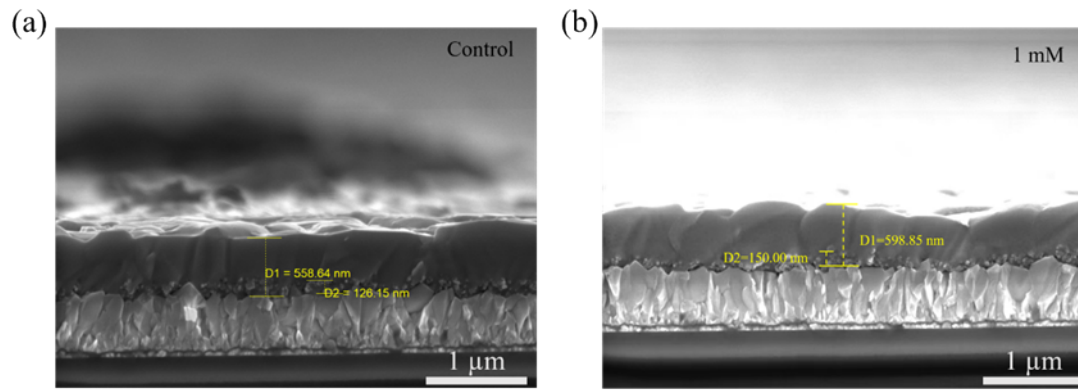

Fig. S9. Cross-sectional SEM images of the (a) control and (b) MgBEN-modified perovskite film.
